# Supplementary material for: Estimating extreme river discharges in Europe through a Bayesian Network
Source: Copernicus journal article supplement (doi:10.5194/hess-2016-250), 2016-06-20
Supplement: Supplementary file [file hess-2016-250-AC2-supplement.pdf]

Estimator of the cumulative probability distribution:

$$\hat{F}(x) = \frac{1}{n} \sum_{i=1}^n 1_{\{x_i \leq x\}} \quad (1)$$

where  $(x_1, \dots, x_n)$  are the samples of a random variable.
